# Supplementary material for: Elemental Markers in Elasmobranchs: Effects of Environmental History and Growth on Vertebral Chemistry
Source: PubMed Central journal article supplement (PMC3787939; doi:10.1371/journal.pone.0062423), 2013-10-01
Supplement: pone.0062423.s001.pdf [file pone.0062423.s001.pdf]

**Table S1.** Supporting information. Correlations ( $r$ ) between partition coefficients ( $D_{Me}$ ) and somatic growth rates and vertebral precipitation rates for the temperature (T) experiment. The number (n) of round rays (*Urobatia halleri*) included in growth rate estimates, observed range of individual somatic growth rates (mm disc width month<sup>-1</sup>), and vertebral precipitation rates (μm radius month<sup>-1</sup>) are reported for each treatment. No significant correlations were detected ( $p \geq 0.12$ ).

|                                       |          | Somatic growth rate |       |                                          | Precipitation rate |       |       |
|---------------------------------------|----------|---------------------|-------|------------------------------------------|--------------------|-------|-------|
| Treatment                             | $D_{Me}$ | $r$                 | $p$   | Treatment                                | $D_{Me}$           | $r$   | $p$   |
| T = 15 °C                             | Li       | 0.288               | 0.162 | T = 15 °C                                | Li                 | 0.041 | 0.970 |
| n = 32                                | Mg       | 0.035               | 0.849 | n = 28                                   | Mg                 | 0.408 | 0.213 |
| Range: 0.5-3.3 mm month <sup>-1</sup> | Mn       | 0.269               | 0.174 | Range: 5.5-31.2 μm month <sup>-1</sup>   | Mn                 | 0.017 | 0.960 |
|                                       | Zn       | 0.119               | 0.545 |                                          | Zn                 | 0.323 | 0.333 |
|                                       | Sr       | 0.296               | 0.127 |                                          | Sr                 | 0.297 | 0.324 |
|                                       | Ba       | 0.051               | 0.779 |                                          | Ba                 | 0.275 | 0.388 |
| T = 18 °C                             | Li       | 0.289               | 0.181 | T = 18 °C                                | Li                 | 0.219 | 0.472 |
| n = 33                                | Mg       | 0.298               | 0.103 | n = 30                                   | Mg                 | 0.193 | 0.473 |
| Range: 1.4-4.5 mm month <sup>-1</sup> | Mn       | 0.173               | 0.369 | Range: 12.8-49.6 μm month <sup>-1</sup>  | Mn                 | 0.245 | 0.379 |
|                                       | Zn       | 0.280               | 0.128 |                                          | Zn                 | 0.320 | 0.226 |
|                                       | Sr       | 0.184               | 0.323 |                                          | Sr                 | 0.337 | 0.202 |
|                                       | Ba       | 0.029               | 0.889 |                                          | Ba                 | 0.283 | 0.307 |
| T = 24 °C                             | Li       | 0.248               | 0.215 | T = 24 °C                                | Li                 | 0.023 | 0.919 |
| n = 33                                | Mg       | 0.208               | 0.246 | n = 30                                   | Mg                 | 0.117 | 0.552 |
| Range: 3.6-8.0 mm month <sup>-1</sup> | Mn       | 0.202               | 0.272 | Range: 36.7-101.0 μm month <sup>-1</sup> | Mn                 | 0.037 | 0.855 |
|                                       | Zn       | 0.139               | 0.465 |                                          | Zn                 | 0.318 | 0.121 |
|                                       | Sr       | 0.193               | 0.282 |                                          | Sr                 | 0.089 | 0.653 |
|                                       | Ba       | 0.264               | 0.166 |                                          | Ba                 | 0.109 | 0.603 |
