# Supplementary material for: Elemental Markers in Elasmobranchs: Effects of Environmental History and Growth on Vertebral Chemistry
Source: PubMed Central journal article supplement (PMC3787939; doi:10.1371/journal.pone.0062423), 2013-10-01
Supplement: pone.0062423.s002.pdf [file pone.0062423.s002.pdf]

**Table S2.** Supporting information. Correlations ( $r$ ) between partition coefficients ( $D_{Me}$ ) and somatic growth rates and vertebral precipitation rates for the barium manipulation ([Ba]) experiment. The number ( $n$ ) of round rays (*Urobatis halleri*) included in growth rate estimates, observed range of individual somatic growth rates (mm disc width month<sup>-1</sup>), and vertebral precipitation rates ( $\mu\text{m}$  radius month<sup>-1</sup>) are reported for each treatment. Significant p-values are indicated by bold font.

| Treatment                             | $D_{Me}$ | Somatic growth rate |              | Treatment                                         | $D_{Me}$ | Precipitation rate |       |
|---------------------------------------|----------|---------------------|--------------|---------------------------------------------------|----------|--------------------|-------|
|                                       |          | $r$                 | $p$          |                                                   |          | $r$                | $p$   |
| [Ba] = 1x                             | Li       | 0.163               | 0.479        | [Ba] = 1x                                         | Li       | 0.421              | 0.105 |
| n = 34                                | Mg       | 0.089               | 0.628        | n = 30                                            | Mg       | 0.006              | 0.979 |
| Range: 1.8-7.8 mm month <sup>-1</sup> | Mn       | 0.210               | 0.265        | Range: 7.3-80.1 $\mu\text{m}$ month <sup>-1</sup> | Mn       | 0.258              | 0.259 |
|                                       | Zn       | 0.327               | 0.083        |                                                   | Zn       | 0.043              | 0.854 |
|                                       | Sr       | 0.175               | 0.338        |                                                   | Sr       | 0.076              | 0.723 |
|                                       | Ba       | 0.012               | 0.953        |                                                   | Ba       | 0.337              | 0.146 |
| [Ba] = 3x                             | Li       | 0.101               | 0.622        | [Ba] = 3x                                         | Li       | 0.172              | 0.525 |
| n = 34                                | Mg       | 0.003               | 0.960        | n = 29                                            | Mg       | 0.167              | 0.471 |
| Range: 2.0-6.5 mm month <sup>-1</sup> | Mn       | 0.209               | 0.260        | Range: 8.9-79.6 $\mu\text{m}$ month <sup>-1</sup> | Mn       | 0.016              | 0.949 |
|                                       | Zn       | 0.462               | <b>0.013</b> |                                                   | Zn       | 0.103              | 0.684 |
|                                       | Sr       | 0.176               | 0.320        |                                                   | Sr       | 0.157              | 0.496 |
|                                       | Ba       | 0.087               | 0.635        |                                                   | Ba       | 0.050              | 0.835 |
| [Ba] = 6x                             | Li       | 0.022               | 0.932        | [Ba] = 6x                                         | Li       | 0.039              | 0.900 |
| n = 29                                | Mg       | 0.197               | 0.297        | n = 28                                            | Mg       | 0.173              | 0.454 |
| Range: 2.0-7.3 mm month <sup>-1</sup> | Mn       | 0.126               | 0.522        | Range: 7.3-73.4 $\mu\text{m}$ month <sup>-1</sup> | Mn       | 0.228              | 0.334 |
|                                       | Zn       | 0.498               | <b>0.010</b> |                                                   | Zn       | 0.097              | 0.296 |
|                                       | Sr       | 0.086               | 0.665        |                                                   | Sr       | 0.253              | 0.296 |
|                                       | Ba       | 0.244               | 0.229        |                                                   | Ba       | 0.428              | 0.076 |
